# Supplementary material for: Screening SIRT1 Activators from Medicinal Plants as Bioactive Compounds against Oxidative Damage in Mitochondrial Function
Source: Oxid Med Cell Longev. 2016 Feb 11;2016:4206392. doi: 10.1155/2016/4206392 (PMC4766345; doi:10.1155/2016/4206392)
Supplement: Supplementary file 1 — A total of 195 constituents of TCMs were screened by the assay to evaluate their regulatory effects on SIRT1 activity. The Supplementary Material illustrated the detailed information related to the chemicals and their CAS number. And the Supplementary Material also provided the orders, activation/inhibition rates and function of 195 constituents in the heatmap of Figure 1. [file 4206392.f1.xlsx]

## Sheet: heatmap
No	Name	Cas	Activation/Inhibition rate	Function	No	Name	Cas	Activation/Inhibition	Function	No	Name	Cas	Activation/Inhibition rate	Function	No	Name	Cas	Activation/Inhibition rate	Function	No	Name	Cas	Activation/Inhibition rate	Function	No	Name	Cas	Activation/Inhibition rate	Function	No	Name	Cas	Activation/Inhibition rate	Function	No	Name	Cas	Activation/Inhibition rate	Function	No	Name	Cas	Activation/Inhibition rate	No	Name	Cas	Activation/Inhibition rate
1	Liriopesides B	182284-68-0	0.647886	tonifying and replenishing medicinal	21	Ginsenoside Rh4	174721-08-5	-0.0572646	tonifying and replenishing medicinal	41	Gypenoside XVII	80321-69-3	0.426763	tonifying and replenishing medicinal	61	Schisandrin A	61281-38-7	0.691296	astringent medicinal	81	Puerarin	3681-99-0	0.497218	heat-clearing medicinal	101	Oxysophocarpine	26904-64-3	0.309456	heat-clearing medicinal	121	Berberine Hydrochloride	633-65-8	-0.365613	heat-clearing medicinal	141	Anthraglycoside B	23313-21-5	-0.00793595	purgative medicinal	161	trifloroside		-0.362776	181	Isoquercitrin	482-35-9	-0.340844
2	Liriope muscari baily saponins C	87480-46-4	0.565778	tonifying and replenishing medicinal	22	Ginsenoside Rh1 S type	63223-86-9	-0.0573625	tonifying and replenishing medicinal	42	Catalpol	2415-24-9	0.0881319	tonifying and replenishing medicinal	62	Schisandrin B	61281-37-6	0.3068	astringent medicinal	82	3’-Methoxy Puerarin	117047-07-1	-0.532605	heat-clearing medicinal	102	Oxymatrine	16837-52-8	0.0236866	heat-clearing medicinal	122	Baicalin	21967-41-9	-0.411181	heat-clearing medicinal	142	Rhein	478-43-3	-0.00935235	purgative medicinal	162	Rosmarinicacid	20283-92-5	-0.788751	182	Betulinic acid	472-15-1	0.0898255
3	20(S)Ginsenoside Rg3	14197-60-5	0.597442	tonifying and replenishing medicinal	23	Ginsenoside Ro	34367-04-9	-0.076713	tonifying and replenishing medicinal	43	p-Cresol	101-94-0	0.057558	tonifying and replenishing medicinal	63	Gomisin D	60546-10-3	0.221218	astringent medicinal	83	Polyphyllin III	19057-60-4	0.323216	heat-clearing medicinal	103	Matrine	519-02-8	-0.341396	heat-clearing medicinal	123	neohesperidin	13241-33-3	0.310371	qi-regulating medicinal	143	Rhaponticin	155-58-8	-0.58969	purgative medicinal	163	Calycosin-7-glucoside	20633-67-4	-0.197444	183	methylophiopogonanone B	methylophiopogonanone B	0.2165
4	Ginsenoside-Rb2	11021-13-9	0.46171	tonifying and replenishing medicinal	24	Ginsenoside Rf	52286-58-5	-0.095173	tonifying and replenishing medicinal	44	Specnuezhenide	39011-92-2	0.0320162	tonifying and replenishing medicinal	64	Schisandrol B	58546-54-6	0.15303	astringent medicinal	84	Polyphyllin VII	76296-75-8	0.319275	heat-clearing medicinal	104	(1S,5R,9R)-deglucosyltrifloroside		-0.437019	heat-clearing medicinal	124	Synephrine	94-07-5	0.0658401	qi-regulating medicinal	144	Sennoside A	81-27-6	-0.309685	purgative medicinal	164	Calycosin	20575-57-9	-0.678898	184	methylpluviatolide		0.211159
5	Ginsenoside F2	62025-49-4	0.452967	tonifying and replenishing medicinal	25	Ginsenoside Rg5	186763-78-0	-0.334838	tonifying and replenishing medicinal	45	Atractylenolide III	73030-71-4	-0.000570734	tonifying and replenishing medicinal	65	Schisantherin A	58546-56-8	-0.0354945	astringent medicinal	85	Polyphyllin VI	55916-51-3	0.307583	heat-clearing medicinal	105	gentioxepine		-0.446148	heat-clearing medicinal	125	Hesperidin	520-26-3	0.0385078	qi-regulating medicinal	145	Peucedanol	28095-18-3	-0.695422	cough-suppressing and panting-calming medicinal	165	mangiferin	4773-96-0	-0.0818198	185	Acetylcysteine		0.169076
6	Ginsenoside Rc	11021-14-0	0.438876	tonifying and replenishing medicinal	26	Ginsenoside Rk1		-0.603485	tonifying and replenishing medicinal	46	Glycyrrhetinic acid	471-53-4	-0.109375	tonifying and replenishing medicinal	66	Anisodine hydrobromide	76822-34-9	0.602361	blood-activating and stasis-dispelling medicinal	86	Polyphyllin Ⅰ	50773-41-6	0.237936	heat-clearing medicinal	106	Quercetin	117-39-5	-0.454697	heat-clearing medicinal	126	esculetin	305-01-1	-0.909099	qi-regulating medicinal	146	Allantoin	97-59-6	-0.0271727		166	Neomangiferin	64809-67-2	-0.109693	186	Isoliquiritin apioside	120926-46-7	0.07317
7	Ginsenoside Rd	52705-93-8	0.33395	tonifying and replenishing medicinal	27	Ophiopogonin D'	65604-80-0	0.541761	tonifying and replenishing medicinal	47	Eleutheroside A		-0.0115337	tonifying and replenishing medicinal	67	Chuangxiongzine hydrochloride	76494-51-4	0.417785	blood-activating and stasis-dispelling medicinal	87	Polyphyllin II	76296-72-5	0.106962	heat-clearing medicinal	107	Timosaponin A-Ⅲ	41059-79-4	0.0722715	heat-clearing medicinal	127	Saikosaponin A	20736-09-8	0.247859	exterior-releasing medicinal	147	Syringin		-0.298381		167	Secologanic acid	357-57-3	-0.178589	187	Adenosine	58-61-7	-0.113792
8	Ginsenoside-Rb3	68406-26-8	0.277586	tonifying and replenishing medicinal	28	Methylophiopogonanone A	74805-92-8	0.386013	tonifying and replenishing medicinal	48	Eleutheroside D		-0.185145	tonifying and replenishing medicinal	68	Leonurine hydrochloride	7097-09-8	-0.0815687	blood-activating and stasis-dispelling medicinal	88	6α-hydroxygeniposide	27530-67-2	0.207546	heat-clearing medicinal	108	Timosaponin C	185432-00-2	-0.0122618	heat-clearing medicinal	128	Saikosaponin A	20736-09-8	0.247859	exterior-releasing medicinal	148	Rutin	153-18-4	0.107655		168	(1S,5R,9R)-scabraside		-0.530002	188	Uridine	58-96-8	-0.14824
9	Ginsenoside F1	53963-43-2	0.219938	tonifying and replenishing medicinal	29	Ruscogenin	472-11-7	0.158048	tonifying and replenishing medicinal	49	Lobetyolin	136085-37-5	-0.0909775	tonifying and replenishing medicinal	69	tetrahydropalmatine	10097-84-4；2934-97-6	-0.134492	blood-activating and stasis-dispelling medicinal	89	epijasminoside A		0.167218	heat-clearing medicinal	109	anemarsaponin B	136656-07-0	-0.136489	heat-clearing medicinal	129	Cimidahurinine	142542-89-0	0.102356	exterior-releasing medicinal	149	Diosmetin	520-34-3	-0.0683832		169	Nuciferine	475-83-2	-0.0210672	189	D-Arabinose	10323-20-3	-0.150283
10	Ginsenoside Rh2	67400-17-3	0.192438	tonifying and replenishing medicinal	30	Ophiopogonin B	38971-41-4	0.0921893	tonifying and replenishing medicinal	50	Digoxin	20830-75-5	-0.192313	tonifying and replenishing medicinal	70	Curcumin	458-37-7	-0.160039	blood-activating and stasis-dispelling medicinal	90	jasminoside A		0.161839	heat-clearing medicinal	110	gentiolactone	65853-15-8	-0.0915076	heat-clearing medicinal	130	Isoferulic Acid	537-73-5	-0.377916	exterior-releasing medicinal	150	Ginkgolide A	15291-75-5	0.0149386		170	Forsythin	487-41-2	-0.0245383	190	Lactulose	4618-18-2	-0.230278
11	Ginsenoside Rb1	41753-43-9	0.110041	tonifying and replenishing medicinal	31	Ophiopogonin D	41753-55-3	-0.216038	tonifying and replenishing medicinal	51	syringaresinol	1177-14-6	-0.0227292	tonifying and replenishing medicinal	71	EC	490-46-0	-0.280136	blood-activating and stasis-dispelling medicinal	91	geniposide	27741-01-1	0.0626198	heat-clearing medicinal	111	4-caffeoylquinic Acid	327-97-9	-0.392215	heat-clearing medicinal	131	Notoginsenoside Ft1	155683-00-4	0.404275	hemostatic medicinal	151	Caffeic acid	331-39-5	-0.763525		171	Forsythiaside	79916-77-1	-0.681485	191	Maltotriose		-0.24427
12	Panaxadiol	19666-76-3	0.0779	tonifying and replenishing medicinal	32	Liquiritin	551-15-5	0.304538	tonifying and replenishing medicinal	52	Chlorogenic Acid	327-97-9	-0.529084	tonifying and replenishing medicinal	72	Tanshinone IIA	568-72-9	-0.270493	blood-activating and stasis-dispelling medicinal	92	Gardenoside	24512-62-7	-0.0330451	heat-clearing medicinal	112	Isochlorogenic acid A	2450-53-5	-0.509291	heat-clearing medicinal	132	R-Notoginsenoside R2	948046-15-9	-0.108349	hemostatic medicinal	152	Vanillic acid	12134-6	0.0545849		172	Isovanillin	621-59-0	0.0866681	192	5-hydroxymethylfurfural	67-47-0	-0.282458
13	Ginsenoside Rh4	174721-08-5	0.0773182	tonifying and replenishing medicinal	33	Liquiritin apioside	199796-12-8	0.0775653	tonifying and replenishing medicinal	53	Salidroside	10338-51-9	-0.00147477	tonifying and replenishing medicinal	73	Tanshinone I	568-73-0	-0.278422	blood-activating and stasis-dispelling medicinal	93	Cytisine	90-39-1	0.211348	heat-clearing medicinal	113	Lithospermic acid	28831-65-4	-0.712428	heat-clearing medicinal	133	Notoginsenoside R1	80418-24-2	-0.155945	hemostatic medicinal	153	Syringate	530-57-4	-0.407838		173	Sparteine Sulfas	90-39-1	0.0210079	193	Guanosine hydrate	118-00-3	-0.294402
14	Ginsenoside F3	62025-50-7	0.0507103	tonifying and replenishing medicinal	34	liquiritigenin	578-86-9	-0.23593	tonifying and replenishing medicinal	54	Astragaloside IV	84687-43-4	-0.0890556	tonifying and replenishing medicinal	74	Salvianolic acid B	115939-25-8	-0.628162	blood-activating and stasis-dispelling medicinal	94	Sophoridine	83148-91-8	0.0789523	heat-clearing medicinal	114	5-caffeoylquinic Acid	906-33-2	-0.347818	heat-clearing medicinal	134	Notoginsenoside R2	80418-25-3	-0.194701	hemostatic medicinal	154	Silybin	22888-70-6	-0.14111		174	Tyrosol	501-94-0	0.0243187	194	2-hydroxy-3-O-β-D-glucosyloxy benzoic acid methyleste		-0.370225
15	Panaxatrol	32791-84-7	0.0231335	tonifying and replenishing medicinal	35	glycyrrhizic acid	1405-86-3	-0.281222	tonifying and replenishing medicinal	55	Astragaloside II	84676-89-1	-0.137368	tonifying and replenishing medicinal	75	Salvianolic acid D	142998-47-8	-0.649231	blood-activating and stasis-dispelling medicinal	95	Sophocarpine	6483-15-4	-0.144039	heat-clearing medicinal	115	1,5-Dicaffeoylqunic acid		-0.482809	heat-clearing medicinal	135	Resibufogenin	465-39-4	0.14381	external medicinal	155	Diosgenin	512-04-9	0.0625078		175	Stigmasterol	83-48-7	-0.0444834	195	cinnamic acid	140-10-3	-0.518527
16	20(R)Ginsenoside Rg3	38243-03-7	0.0230282	tonifying and replenishing medicinal	36	licorice-saponin G2		-0.283538	tonifying and replenishing medicinal	56	Astragaloside I	84680-75-1	-0.200455	tonifying and replenishing medicinal	76	salvianic acid A sodium	67920-52-9	-0.670909	blood-activating and stasis-dispelling medicinal	96	Cholic acid	81-25-4	0.0225049	heat-clearing medicinal	116	Isochlorogenic acid C	32451-88-0	-0.500397	heat-clearing medicinal	136	Cinobufagin	470-37-1	0.104897	external medicinal	156	Kaempferol	520-18-3	-0.298014		176	Daidzin	552-66-9	-0.35915
17	Ginsenoside Rg2(S type)	52286-74-5	0.000186402	tonifying and replenishing medicinal	37	methylester of glycyrrhizin		-0.330511	tonifying and replenishing medicinal	57	Ononin	486-62-4	-0.406409	tonifying and replenishing medicinal	77	Salvianolic acid A	96574-01-5	-0.93605	blood-activating and stasis-dispelling medicinal	97	Ursodeoxycholic acid	83-49-8	-0.226876	heat-clearing medicinal	117	3,5-Dicaffeoylquinic acid		-0.848639	heat-clearing medicinal	137	Cinobufagin	470-37-1	-0.115981	external medicinal	157	Isorhamnetin	480-19-3	-0.385882		177	Acacetin	480-44-4	-0.0747381
18	Ginsenoside Re	51542-56-4	-0.0257814	tonifying and replenishing medicinal	38	isoliquiritigenin	961-29-5	-0.451601	tonifying and replenishing medicinal	58	2,3,5,4'-Tetrahydroxy stilbene-2-Ο-β-D-glucoside	55327-45-2	-0.741836	tonifying and replenishing medicinal	78	Sesamin	607-80-7	0.0589662	wind-dampness dispelling medicinal	98	Chenodeoxycholic acid	474-25-9	-0.237086	heat-clearing medicinal	118	Hyperoside	482-36-0	-0.289537	heat-clearing medicinal	138	Ferulic Acid	1135-24-6	-0.477497	digestant medicinal	158	Anagyrine	486-89-5	-0.0398371		178	(−)-Epigallocatechin gallate/EGCG	989-51-5	-0.465274
19	Ginsenoside Rg1	22427-39-0	-0.0258431	tonifying and replenishing medicinal	39	Paeoniflorin	23180-57-6	0.134824	tonifying and replenishing medicinal	59	Acteoside	61276-17-3	-0.858917	tonifying and replenishing medicinal	79	Tetrandrine	518-34-3	0.0915912	wind-dampness dispelling medicinal	99	Taurochenodeoxycholic acid	516-35-8	0.0237102	heat-clearing medicinal	119	Palmatine hydrochloride	10605-02-4	-0.159149	heat-clearing medicinal	139	Rutecarpine	518-17-2	-0.129855	interior-warming medicinal	159	Naringin	10236-47-2	-0.14101		179	Oleanolic Acid	508-02-1	-0.102144
20	20(R)Ginsenoside Rh1	63223-86-9	-0.0562602	tonifying and replenishing medicinal	40	Albiflorin	39011-90-0	-0.150254	tonifying and replenishing medicinal	60	Protocatechuic Aldehyde	139-85-5	-0.218317	tranquillizing medicinal	80	Alisol B 23-acetate	26575-95-1	-0.0798443	dampness-draining diuretic medicinal	100	Tauroursodeoxycholic acid sodium salt	14605-22-2	-0.0166177	heat-clearing medicinal	120	epiberberine	1816598	-0.913027	heat-clearing medicinal	140	Rutaecarpine	84-26-4	-0.773072	interior-warming medicinal	160	Ursolic Acid	77-52-1	-0.265577		180	Hydroxytyrosol	10597-60-1	-0.224471

## Sheet: 1-46
NO.	name				average	SD	P value
	Control	1	1	1	1	0
1	Diosmetin	0.831869	0.945803	1.01718	0.931617	0.0934653	0.273824
2	Acacetin	0.918381	0.862636	0.994768	0.925262	0.0663343	0.122748
3	Taurochenodeoxycholic acid	1.05948	0.930746	1.0809	1.02371	0.0812188	0.639702
4	Tauroursodeoxycholic acid sodium salt	0.956554	0.959919	1.03367	0.983382	0.0435866	0.545115
5	Atractylenolide III	0.965653	1.01913	1.01351	0.999429	0.029386	0.974776
6	Isovanillin	1.16406	0.909707	1.18624	1.08667	0.153654	0.383906
7	Tyrosol	1.04865	0.901013	1.1233	1.02432	0.113121	0.728518
8	Stigmasterol	1.19087	0.561014	1.11467	0.955517	0.343767	0.833641
9	Albiflorin	1.14575	0.977337	0.426156	0.849746	0.37638	0.52732
10	Peucedanol	0.283784	0.290468	0.339482	0.304578	0.030412	2.42802e-06
11	Paeoniflorin	1.0927	1.12411	1.18766	1.13482	0.0483799	0.00848073
12	Rutin	1.31274	0.939261	1.07097	1.10765	0.189421	0.380655
13	Oleanolic Acid	0.471675	1.02811	1.19379	0.897856	0.378265	0.664335
14	Gardenoside	0.858306	0.977705	1.06485	0.966955	0.103693	0.610353
15	Forsythin	0.909809	0.985471	1.03111	0.975462	0.0612643	0.526025
16	Forsythiaside	0.812254	0.0784906	0.0648009	0.318515	0.427645	0.0508417
17	Rhein	0.9952	0.912536	1.06421	0.990648	0.0759379	0.841512
18	Ginsenoside Re	0.933907	0.901604	1.08714	0.974219	0.099122	0.675687
19	Ginsenoside Rg2(S type)	0.993285	0.887359	1.11992	1.00019	0.116432	0.99792
20	Ginsenoside F3	1.02482	0.951794	1.17552	1.05071	0.114085	0.484313
21	Ginsenoside Rc	1.61015	1.20908	1.4974	1.43888	0.206838	0.0212951
22	Ginsenoside F2	1.45463	1.70071	1.20356	1.45297	0.248582	0.0343106
23	Ginsenoside F1	1.15648	1.21076	1.29258	1.21994	0.0685121	0.0051225
24	Ginsenoside Rh2	1.30083	0.984632	1.29186	1.19244	0.180021	0.137747
25	Ginsenoside Rg1	0.972266	0.993192	0.957013	0.974157	0.0181636	0.0693662
26	Ginsenoside Rb1	1.11449	1.10078	1.11484	1.11004	0.00801794	1.85711e-05
27	Ginsenoside-Rb2	1.74202	1.3067	1.33641	1.46171	0.243207	0.0302677
28	Ginsenoside-Rb3	1.17787	1.28906	1.36583	1.27759	0.0945064	0.00704415
29	Ginsenoside Rd	0.838019	1.95277	1.21106	1.33395	0.567444	0.365678
30	Ginsenoside Rf	0.909306	0.816726	0.98845	0.904827	0.0859498	0.127578
31	20(R)Ginsenoside Rh1	0.956741	0.900974	0.973504	0.94374	0.0379724	0.0622268
32	20(S)Ginsenoside Rg3	1.72663	1.36136	1.70433	1.59744	0.204758	0.00721196
33	20(R)Ginsenoside Rg3	1.0477	1.06161	0.959768	1.02303	0.0552244	0.510106
34	Panaxadiol	1.1815	1.0479	1.0043	1.0779	0.0923319	0.217728
35	Panaxatrol	0.971854	0.993076	1.10447	1.02313	0.071234	0.603811
36	Ginsenoside Rh4	0.959274	0.849943	1.01899	0.942735	0.0857283	0.311671
37	Ginsenoside Rk3	1.03483	1.05578	1.14135	1.07732	0.056432	0.0765617
38	Ginsenoside Rk1	0.447945	0.348516	0.393084	0.396515	0.0498031	3.04597e-05
39	Ginsenoside Rh1 S type	0.923311	0.956414	0.948187	0.942638	0.0172349	0.00449338
40	Notoginsenoside R1	0.69909	0.901666	0.93141	0.844055	0.126422	0.0994743
41	Notoginsenoside R2	0.817365	0.814634	0.783897	0.805299	0.0185846	5.42381e-05
42	Notoginsenoside Ft1	1.50311	1.4049	1.30482	1.40427	0.0991441	0.00212006
43	R-Notoginsenoside R2	0.933929	0.857198	0.883827	0.891651	0.038959	0.00854166
44	Ginsenoside Ro	0.998155	0.883628	0.888077	0.923287	0.0648761	0.109931
45	Ginsenoside Rg5	0.847614	0.621558	0.526315	0.665162	0.165028	0.0245765
46	Diosgenin	1.12903	0.973632	1.08486	1.06251	0.0800756	0.247748

## Sheet: 47-93
NO.	name				average	SD	P value
	Control	1	1	1	1	0
47	Sparteine Sulfas	0.979598	1.00556	1.07787	1.02101	0.050924	0.514383
48	Saikosaponin A	1.19914	1.20774	1.3367	1.24786	0.0770619	0.00508719
49	Polyphyllin III	1.1782	1.32927	1.46217	1.32322	0.142084	0.016958
50	Polyphyllin II	0.984433	1.01595	1.3205	1.10696	0.185603	0.374685
51	Polyphyllin VII	1.14465	1.4152	1.39798	1.31927	0.151476	0.0217572
52	Polyphyllin Ⅰ	1.18341	1.20215	1.32825	1.23794	0.0787724	0.00637607
53	Polyphyllin VI	1.24046	1.33425	1.34804	1.30758	0.0585382	0.000808439
54	Gypenoside XVII	1.37365	1.44022	1.46642	1.42676	0.0478276	0.000102294
55	Cinobufagin	1.09306	1.0428	1.17883	1.1049	0.0687842	0.0574959
56	Allantoin	0.843729	0.979476	1.09528	0.972827	0.125906	0.727519
57	Ferulic Acid	0.517053	0.565677	0.48478	0.522503	0.0407229	3.47052e-05
58	Resibufogenin	1.04022	1.04079	1.35042	1.14381	0.178933	0.236306
59	Sesamin	1.02565	1.04554	1.10572	1.05897	0.0416902	0.070461
60	Quercetin	0.500061	0.593745	0.542105	0.545303	0.0469239	7.38569e-05
61	Vanillic acid	1.05824	0.993107	1.11241	1.05458	0.0597349	0.188651
62	EC	0.830255	0.519083	0.810255	0.719864	0.174169	0.0495212
63	Kaempferol	0.664651	0.606159	0.835148	0.701986	0.118972	0.0122662
64	Ursolic Acid	0.495982	0.81788	0.889408	0.734423	0.209571	0.0931784
65	Digoxin	0.521171	0.988522	0.913369	0.807687	0.250959	0.255103
66	4-caffeoylquinic Acid	0.538326	0.394083	0.890945	0.607785	0.255609	0.0565249
67	Isochlorogenic acid A	0.526937	0.194398	0.750791	0.490709	0.27996	0.034485
68	Isochlorogenic acid C	0.472287	0.522763	0.503759	0.499603	0.0254934	4.46536e-06
69	5-caffeoylquinic Acid	0.57461	0.48163	0.900306	0.652182	0.219853	0.0518955
70	Chlorogenic Acid	0.234244	0.308565	0.869937	0.470916	0.347555	0.057779
71	Isoquercitrin	0.412652	0.730924	0.833892	0.659156	0.219599	0.0547519
72	Hyperoside	0.47547	0.735338	0.920581	0.710463	0.223596	0.0883419
73	Calycosin	0.187688	0.376752	0.398866	0.321102	0.116068	0.00053437
74	Calycosin-7-glucoside	0.45476	0.894702	1.05821	0.802556	0.312097	0.33473
75	Protocatechuic Aldehyde	0.411802	0.898218	1.03503	0.781683	0.327548	0.312593
76	Glycyrrhetinic acid	0.924627	0.943952	0.803295	0.890625	0.0762444	0.0678693
77	Isoferulic Acid	0.660597	0.809294	0.396361	0.622084	0.209143	0.0351933
78	salvianic acid A sodium	0.218084	0.152323	0.616866	0.329091	0.25138	0.00986125
79	Rosmarinicacid	0.106604	0.116311	0.41083	0.211249	0.172911	0.00138812
80	Chenodeoxycholic acid	0.998391	1.07904	0.211308	0.762914	0.479404	0.439965
81	Ursodeoxycholic acid	1.06864	1.1346	0.116126	0.773124	0.569932	0.52843
82	Cholic acid	0.916683	0.937634	1.2132	1.0225	0.165477	0.825344
83	Salvianolic acid A	0.0504062	0.0495144	0.0919299	0.0639501	0.0242353	2.99129e-07
84	Salvianolic acid B	0.317308	0.151893	0.646312	0.371838	0.25168	0.0124181
85	Salvianolic acid D	0.180967	0.10094	0.7704	0.350769	0.365608	0.0370863
86	Betulinic acid	1.58485	0.750891	0.933737	1.08983	0.438342	0.740563
87	Secologanic acid	0.734786	0.746675	0.982772	0.821411	0.139869	0.0914704
88	Syringate	0.83965	0.724173	0.212664	0.592162	0.333688	0.101693
89	Matrine	0.884574	0.766418	0.324822	0.658604	0.29504	0.115563
90	Tetrandrine	1.05205	1.03423	1.18849	1.09159	0.0843926	0.133313
91	Berberine Hydrochloride	0.650433	0.54322	0.709508	0.634387	0.0842973	0.00168051
92	tetrahydropalmatine	0.88222	0.926257	0.788045	0.865508	0.0706056	0.0299536
93	Cytisine	1.71176	1.03657	0.885719	1.21135	0.439881	0.452099

## Sheet: 94-136
NO.	name				average	SD	P value
	Control	1	1	1	1	0
94	Anagyrine	0.919853	0.973199	0.987437	0.960163	0.0356277	0.124851
95	Rutaecarpine	0.298271	0.101084	0.28143	0.226928	0.109309	0.000255034
96	Rutecarpine	0.716116	0.887812	1.00651	0.870145	0.146	0.19828
97	Palmatine hydrochloride	0.848804	0.784931	0.888819	0.840851	0.0523986	0.00625149
98	Sophocarpine	0.783388	0.91509	0.869405	0.855961	0.0668725	0.0202841
99	Sophoridine	1.08816	0.885937	1.26276	1.07895	0.188582	0.508512
100	Oxymatrine	1.10511	0.919062	1.04689	1.02369	0.0951688	0.688618
101	Oxysophocarpine	1.03467	1.31871	1.57499	1.30946	0.270281	0.118381
102	Chuangxiongzine hydrochloride	1.1224	1.43965	1.6913	1.41779	0.28508	0.0640948
103	Anisodine hydrobromide	1.24781	1.60775	1.95152	1.60236	0.351885	0.0413509
104	Leonurine hydrochloride	0.868953	0.917221	0.96912	0.918431	0.0500948	0.0478148
105	Synephrine	0.868691	1.32385	1.00498	1.06584	0.233602	0.650978
106	Ephedrine hydrochloride	1.08909	1.41821	1.08194	1.19641	0.192116	0.151301
107	Cinobufagin	0.747447	0.828073	1.07654	0.884019	0.17153	0.306545
108	Acetylcysteine	0.988042	1.55486	0.964323	1.16908	0.334312	0.430498
109	p-Cresol	0.805465	1.41609	0.951115	1.05756	0.318927	0.77021
110	Anthraglycoside B	0.963053	1.27808	0.73506	0.992064	0.27267	0.962212
111	Gomisin D	0.858941	1.22449	1.58023	1.22122	0.360654	0.347936
112	Liquiritin	1.00746	1.18042	1.72573	1.30454	0.374875	0.232152
113	Schisandrin A	1.31411	1.7161	2.04368	1.6913	0.365419	0.0305962
114	Schisandrin B	1.2163	1.60551	1.09859	1.3068	0.265303	0.115724
115	Schisantherin A	0.849275	1.01241	1.03183	0.964506	0.100264	0.57292
116	Isoliquiritin apioside	0.83818	1.3346	1.04673	1.07317	0.249262	0.637906
117	Schisandrol B	0.863083	1.53543	1.06058	1.15303	0.345574	0.485845
118	2,3,5,4'-Tetrahydroxy stilbene-2-Ο-β-D-glucoside	0.0645866	0.425502	0.284402	0.258164	0.181883	0.0021181
119	Ophiopogonin B	1.13206	1.17793	0.96658	1.09219	0.111172	0.224266
120	Liquiritin apioside	0.835058	1.3963	1.00134	1.07757	0.288282	0.665443
121	(−)-Epigallocatechin gallate/EGCG	0.0902178	1.22089	0.293066	0.534726	0.602832	0.252247
122	Ginkgolide A	0.90351	0.876671	1.26463	1.01494	0.216659	0.910697
123	Curcumin	0.298317	1.13316	1.08841	0.839961	0.469611	0.586747
124	neohesperidin	0.993581	1.22848	1.70906	1.31037	0.3647	0.214482
125	Rhaponticin	0.182429	0.610265	0.438235	0.41031	0.215281	0.00900811
126	Baicalin	0.407151	0.625542	0.733764	0.588819	0.166374	0.0128413
127	Hesperidin	0.801813	1.29025	1.02347	1.03851	0.244563	0.798568
128	Nuciferine	0.739927	1.29812	0.898756	0.978933	0.287602	0.905162
129	Silybin	0.649222	1.12029	0.807158	0.85889	0.239757	0.365648
130	Naringin	0.608828	1.27824	0.689898	0.85899	0.36534	0.540403
131	Salidroside	0.773799	1.19865	1.02312	0.998525	0.213493	0.991027
132	Liriopesides B	1.65067	1.61334	1.67964	1.64789	0.0332385	4.59138e-06
133	Ruscogenin	0.882934	1.29739	1.29382	1.15805	0.238262	0.314615
134	methylophiopogonanone B	0.895468	1.21867	1.53536	1.2165	0.319952	0.306232
135	Ophiopogonin D'	1.39811	1.36048	1.86669	1.54176	0.282023	0.0291806
136	Methylophiopogonanone A	1.18852	1.28264	1.68687	1.38601	0.26477	0.0649965

## Sheet: 137-179
NO.	name				average	SD	P value
	Control	1	1	1	1	0
137	Liriope muscari baily saponins C	1.49053	1.72643	1.48037	1.56578	0.13922	0.00214706
138	Ophiopogonin D	0.851232	0.563721	0.936934	0.783962	0.195489	0.128137
139	Astragaloside IV	0.957361	0.839646	0.935826	0.910944	0.0626778	0.0696179
140	Lobetyolin	0.900208	0.844091	0.982768	0.909022	0.0697576	0.086783
141	Lithospermic acid	0.35199	0.146723	0.364003	0.287572	0.122126	0.000539934
142	Tanshinone IIA	0.74432	0.706091	0.738111	0.729507	0.0205154	2.17807e-05
143	Acteoside	0.240631	0.0629878	0.119632	0.141083	0.0907434	8.10342e-05
144	Neomangiferin	0.948405	0.887133	0.835383	0.890307	0.0565777	0.0283547
145	epiberberine	0.0510925	0.0631	0.146726	0.0869728	0.0520948	7.0148e-06
146	Timosaponin A-Ⅲ	1.16463	1.035	1.01719	1.07227	0.080476	0.194813
147	mangiferin	0.967243	0.953342	0.833955	0.91818	0.0732714	0.12522
148	Catalpol	1.06734	1.09632	1.10074	1.08813	0.018142	0.00109216
149	Timosaponin C	0.818074	0.785464	1.35968	0.987738	0.32252	0.950657
150	anemarsaponin B	0.912547	0.822349	0.855638	0.863511	0.0456119	0.0065928
151	Ononin	0.686581	0.549072	0.545119	0.593591	0.0805561	0.000945039
152	Alisol B 23-acetate	1.02113	0.842281	0.89706	0.920156	0.0916324	0.205744
153	Sennoside A	0.556253	0.324464	1.19023	0.690315	0.448181	0.29746
154	D-Arabinose	0.9664	0.815966	0.766786	0.849717	0.103999	0.0665618
155	Tanshinone I	0.773032	0.653061	0.738641	0.721578	0.0617786	0.00145333
156	1,5-Dicaffeoylqunic acid	0.702779	0.346332	0.502461	0.517191	0.17868	0.00944654
157	3,5-Dicaffeoylquinic acid	0.217328	0.090697	0.146057	0.151361	0.0634819	2.06174e-05
158	Uridine	0.943456	0.769503	0.84232	0.85176	0.0873597	0.0424267
159	Adenosine	0.948078	0.843177	0.867368	0.886208	0.0549294	0.0230001
160	Eleutheroside A	0.975609	1.03368	0.956113	0.988466	0.0403486	0.646486
161	Eleutheroside D	0.823162	0.692497	0.928905	0.814855	0.118423	0.0536518
162	5-hydroxymethylfurfural	0.699404	0.605835	0.847387	0.717542	0.121793	0.0159051
163	Maltotriose	0.801617	0.572092	0.893482	0.75573	0.165536	0.0629129
164	Caffeic acid	0.322472	0.0381293	0.348823	0.236475	0.172277	0.00154852
165	Lactulose	0.749246	0.590393	0.969526	0.769722	0.190394	0.104254
166	Guanosine hydrate	0.677337	0.641677	0.79778	0.705598	0.0817987	0.00337342
167	Syringin	0.744045	0.550047	0.810765	0.701619	0.135438	0.0188455
168	Astragaloside I	0.867634	0.688072	0.842931	0.799545	0.097326	0.0234309
169	Astragaloside II	0.978131	0.744348	0.865417	0.862632	0.116916	0.111573
170	Isorhamnetin	0.577178	0.735843	0.529334	0.614118	0.108097	0.00347671
171	methylester of glycyrrhizin	0.701813	0.63625	0.670404	0.669489	0.0327911	6.32041e-05
172	liquiritigenin	0.763564	0.626215	0.902429	0.76407	0.138108	0.0416007
173	licorice-saponin G2	0.773727	0.519711	0.855947	0.716462	0.175281	0.0487217
174	isoliquiritigenin	0.672545	0.344479	0.628174	0.548399	0.177989	0.0117401
175	glycyrrhizic acid	0.738986	0.581087	0.836262	0.718778	0.128782	0.0193974
176	esculetin	0.0988917	0.0740053	0.0998069	0.0909013	0.0146395	4.48044e-08
177	cinnamic acid	0.697491	0.541703	0.205226	0.481473	0.251599	0.0233834
178	gentioxepine	0.631799	0.472349	0.557409	0.553852	0.0797845	0.000635942
179	(1S,5R,9R)-deglucosyltrifloroside	0.55418	0.526523	0.60824	0.562981	0.0415637	5.34667e-05

## Sheet: 180-195
NO.	name				average	SD	P value
	Control	1	1	1	1	0
180	(1S,5R,9R)-scabraside	0.332251	0.54692	0.530823	0.469998	0.119564	0.00154744
181	syringaresinol	1.12235	0.921788	0.887678	0.977271	0.126791	0.00727389
182	2-hydroxy-3-O-β-D-glucosyloxy benzoic acid methyleste	0.456269	0.728531	0.704524	0.629775	0.150739	0.0378188
183	gentiolactone	0.852488	0.9565	0.91649	0.908492	0.0524654	0.0389864
184	trifloroside	0.525573	0.722369	0.66373	0.637224	0.10104	0.01453
185	geniposide	1.14188	1.17929	0.866688	1.06262	0.17071	0.0205767
186	epijasminoside A	1.36175	1.20985	0.930054	1.16722	0.218981	0.549685
187	jasminoside A	1.34512	1.19288	0.947519	1.16184	0.200608	0.976479
188	6α-hydroxygeniposide	1.57841	1.14683	0.897395	1.20755	0.344546	0.852288
189	Daidzin	-0.255805	1.20969	0.968663	0.64085	0.785822	0.316453
190	Puerarin	4.28375	0.109936	0.0979626	1.49722	2.41322	0.5903
191	methylpluviatolide	1.5727	1.15985	0.900933	1.21116	0.338809	0.848809
192	3’-Methoxy Puerarin	0.560076	0.467211	0.374898	0.467395	0.0925895	0.0214332
193	Cimidahurinine	1.25766	1.15327	0.896131	1.10236	0.186067	0.00612136
194	Specnuezhenide	1.03252	1.15325	0.910277	1.03202	0.121489	0.612678
195	Hydroxytyrosol	0.622865	0.930921	0.772802	0.775529	0.154046	0.0862599
